# Supplementary material for: Morphology and pervaporation performance of ionic liquid and waterborne polyurethane composite membranes
Source: Royal Society of Chemistry journal article supplement (doi:10.1039/c7ra13761c), 2018-01-01
Supplement: c7ra13761c1.pdf [file c7ra13761c1.pdf]

# Morphology and pervaporation performance of ionic liquid and waterborne polyurethane composite membranes

Tao Xi,<sup>a</sup> Lin Tang,<sup>a</sup> Wentao Hao,<sup>a</sup> Lulu Yao<sup>a</sup> and Peng Cui<sup>\*a</sup>

## 1. Supporting Information

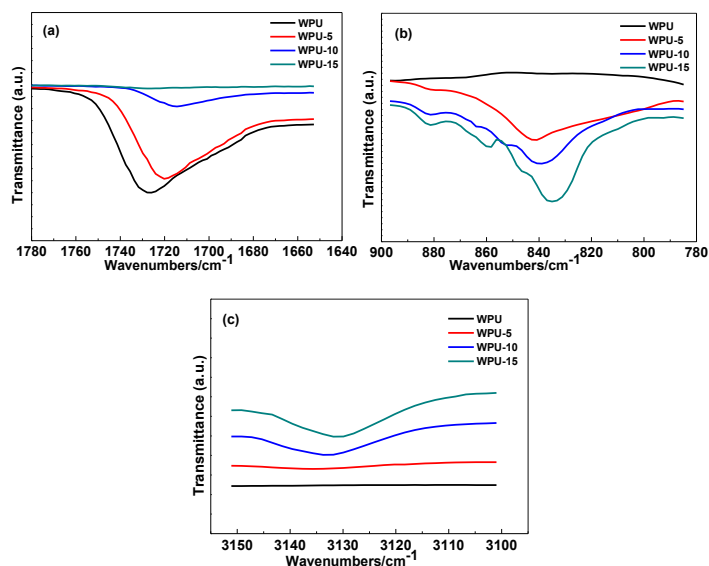

S1. FTIR spectra of pure WPU and [emim][PF<sub>6</sub>]/WPU composite membranes, (a), (b), (c) changes in 3150-3110 cm<sup>-1</sup>, 1680-1760 cm<sup>-1</sup> and 800-870 cm<sup>-1</sup> wavenumber with the addition of [emim][PF<sub>6</sub>].

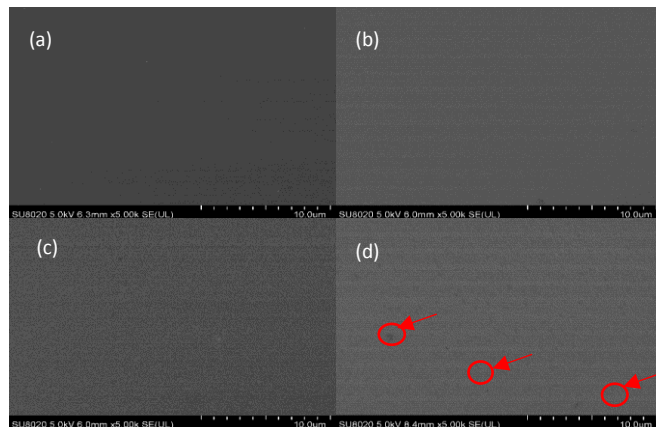

S2. SEM photographs of cross section of pure WPU and [emim][PF<sub>6</sub>]/WPU composite membranes: (a) cross section of WPU, (b) cross section of WPU-5, (c) cross section of WPU-10, (d) cross section of -15.

<sup>a</sup> School of Chemistry & Chemical Engineering, Anhui Key Laboratory of Controllable Chemistry Reaction & Material Chemical, Hefei University of Technology, Hefei, 230009, People's Republic of China.

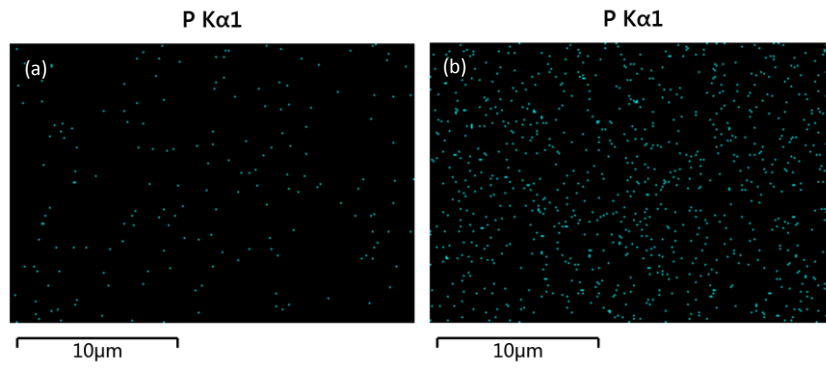

**S3.** Element mapping of the cross section of [emim][PF<sub>6</sub>]/WPU composite membranes. (a) Phosphorus (P) signals are from WPU-5, (b) P signals are from WPU-10.
